# Supplementary material for: Detection of dopamine on a poly(metanilic acid) decorated two-dimensional gold cavity array electrode
Source: Royal Society of Chemistry journal article supplement (doi:10.1039/c4ra07649d), 2014-09-16
Supplement: c4ra07649d1.pdf [file c4ra07649d1.pdf]

## **Detection of Dopamine on a Poly(metaniic acid) Decorated Two-dimensional Gold Cavity Array Electrode**

Dongli Fan, ShuangShuang Wu, Shu Tian\*, Jingyang Zhou, Ju Yun, Chunjuan Ma,  
and Jian Shi\*

*School of Chemistry and Chemical Engineering, Nantong University, Nantong  
226007, P. R. China*

\*To whom correspondence should be addressed. *E-mail:* [tian0429@ntu.edu.cn](mailto:tian0429@ntu.edu.cn);  
[shijianchuyu@163.com](mailto:shijianchuyu@163.com) Tel: 86-513-85012856 Fax: 86-513-85012851

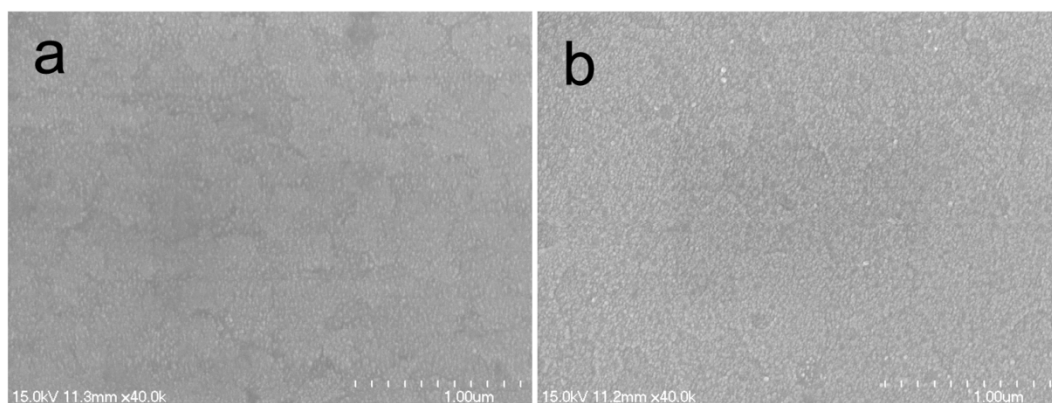

Figure S1 Gold seeds produced on the surface of ITO electrodes with the first pulse in (a)  $10 \text{ mA}\cdot\text{cm}^{-2}$  and (b)  $50 \text{ mA}\cdot\text{cm}^{-2}$  current density.

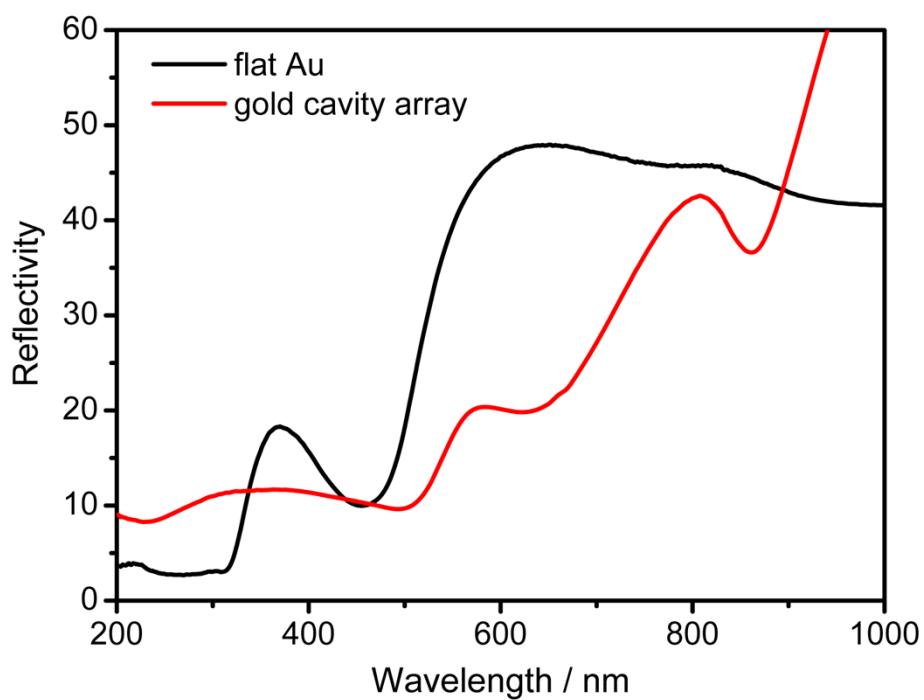

Figure S2 Typical UV-vis reflection spectra of the flat Au and gold cavity array substrates.

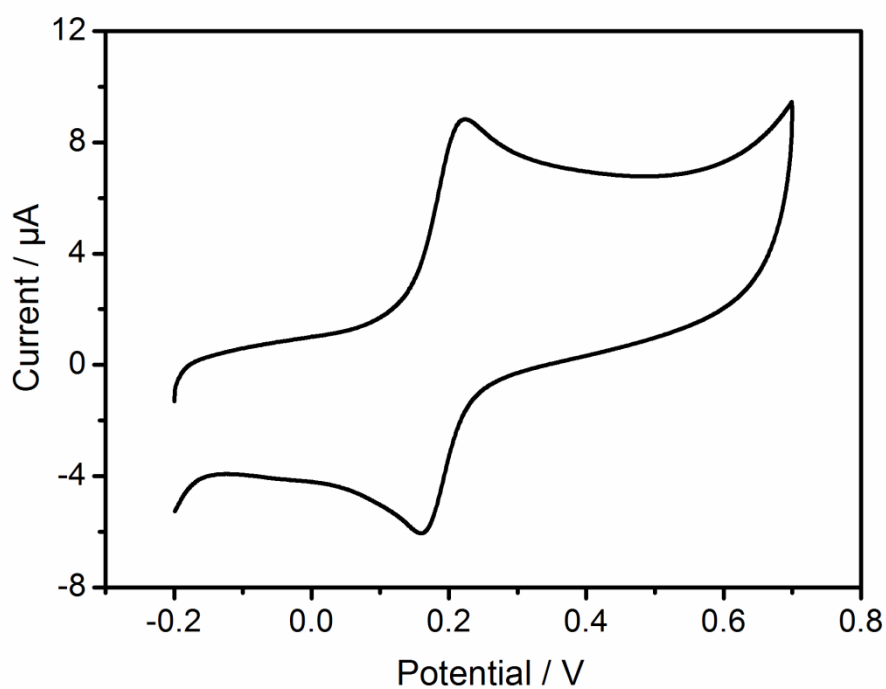

**Figure S3** CV obtained at the GCA electrode in 0.1M PBS (pH 7.0) containing 50  $\mu\text{M}$  DA. Scan rate: 50 mV/s.

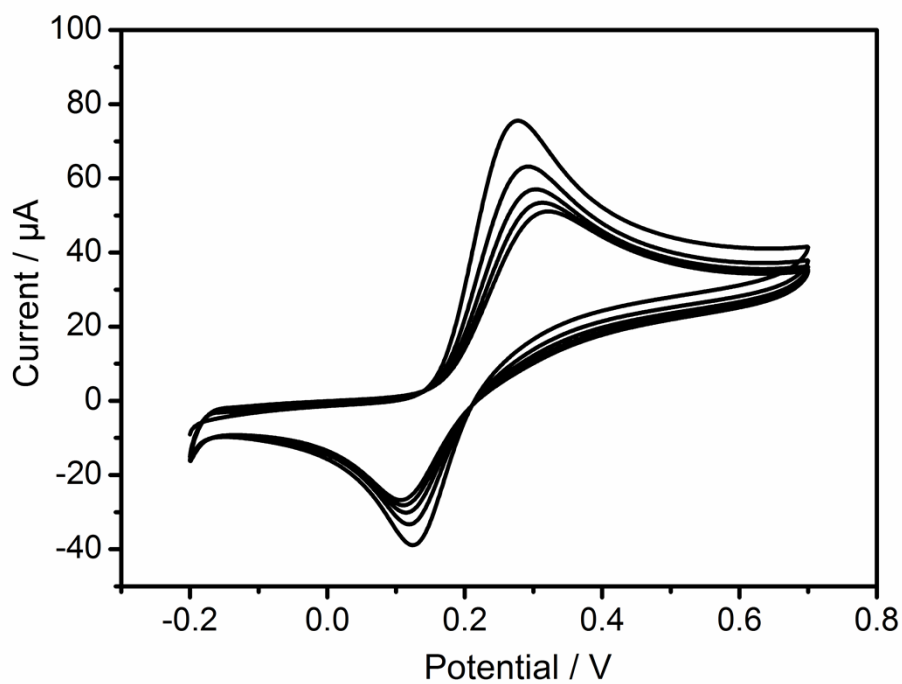

**Figure S4** CV evolutions at the GCA electrode in 0.5 mM DA for 5 times of consecutive scanning. Scan rate: 50 mV/s.

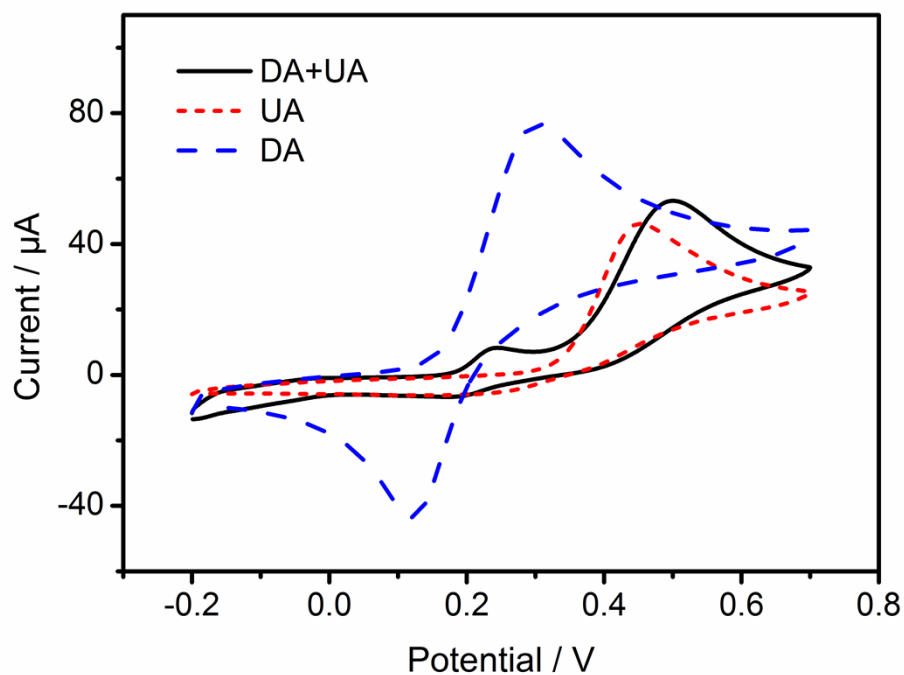

**Figure S5** CVs for the oxidation of 0.5 mM DA (blue dash), 1 mM UA (red short dash) at the GCA electrode, and a mixture of 50  $\mu\text{M}$  DA + 1 mM UA (black solid) at the poly(metanic acid) nmodified GCA electrode. Scan rate: 50 mV/s.

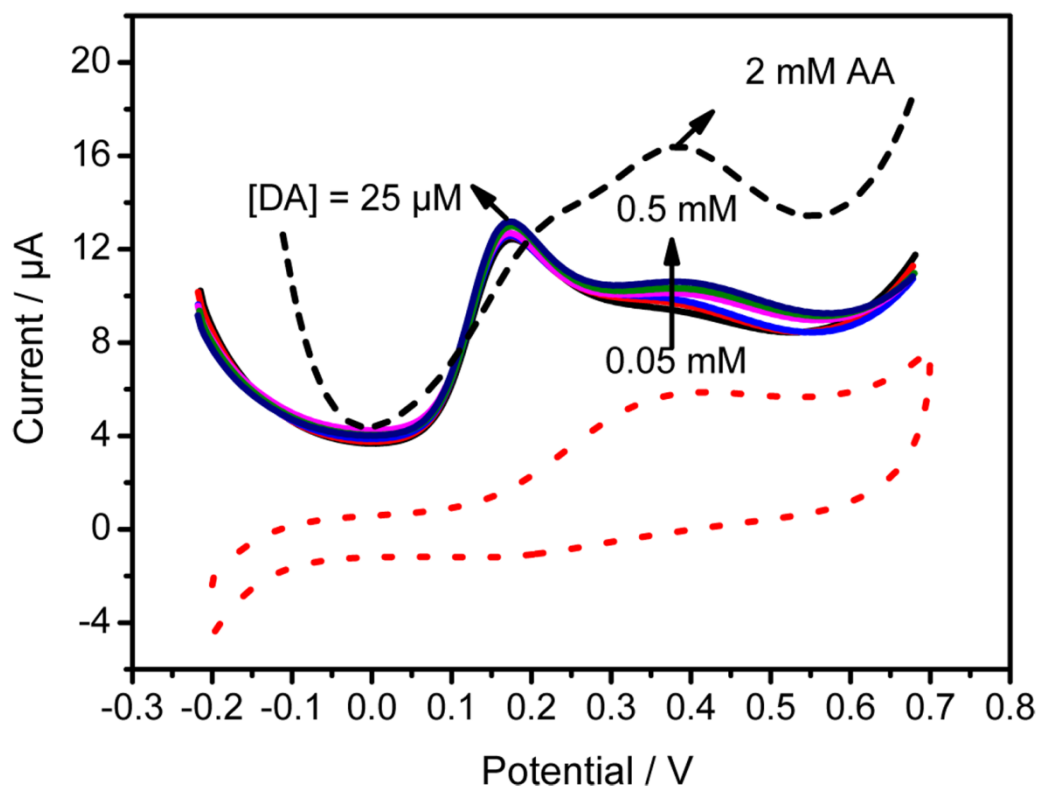

Figure S6 SWVs of the modified GCA electrode in 0.1 M PBS (pH 7.0) solution containing 25  $\mu\text{M}$  DA and increasing concentrations of AA (0.05, 0.1, 0.2, 0.3, 0.4, and 0.5 mM), SWV (black short dash) and CV (red dot) of 2 mM AA at the modified GCA electrode.
